# Supplementary material
Source: publisher figshare collection journal article supplement (https://frontiersin.figshare.com/ndownloader/files/31046017)
Supplement: Supplementary file [file 31046017]

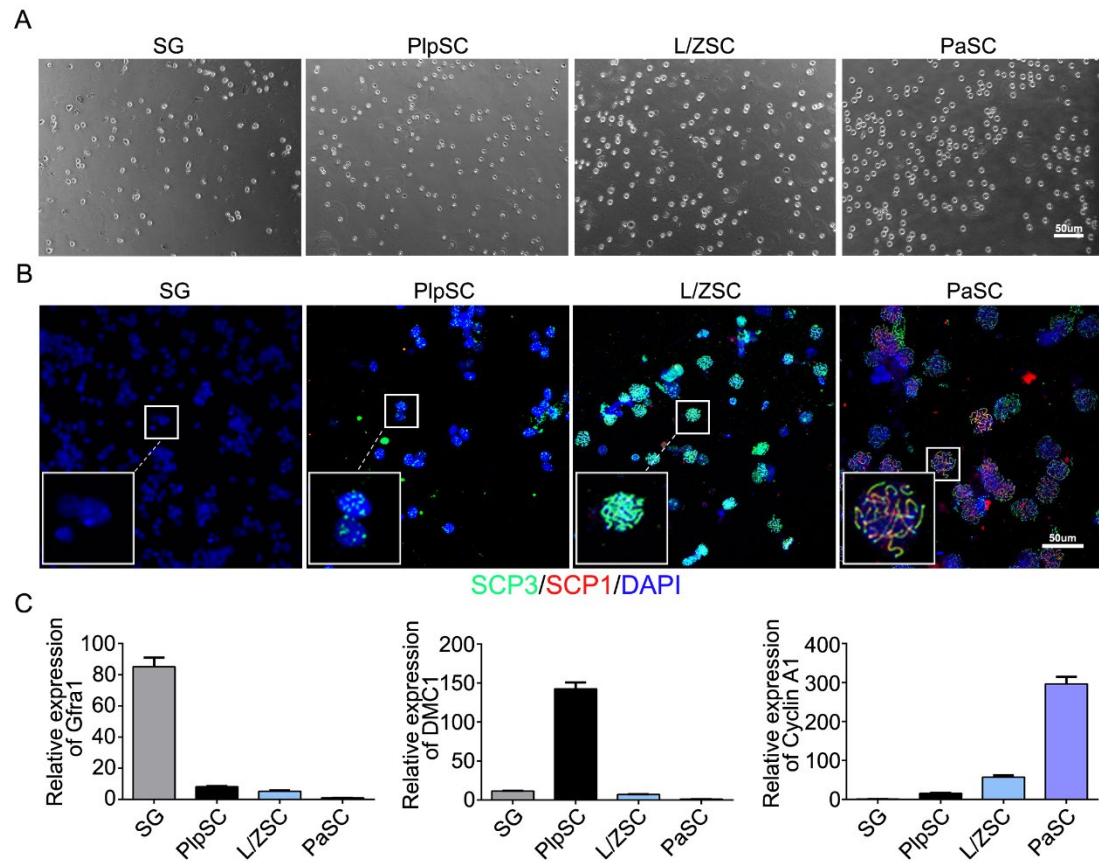

**Supplementary Figure 1. Validation of the purity of spermatogenic cells at different stages of meiosis.** (A) Morphology of spermatogenic cells at different stages of meiosis isolated by STA-PUT under bright field. Scale bar: 50  $\mu$ m. (B) Confirmation of the purity of the isolated spermatogenic cells at different stages of meiosis by immunofluorescence analysis. Blue: cell nucleus; green: SCP3; red: SCP1. Scale bar: 50  $\mu$ m. (C) Confirmation of the purity of the separated spermatogenic cells at different stages by qRT-PCR. GAPDH was used as a reference control.

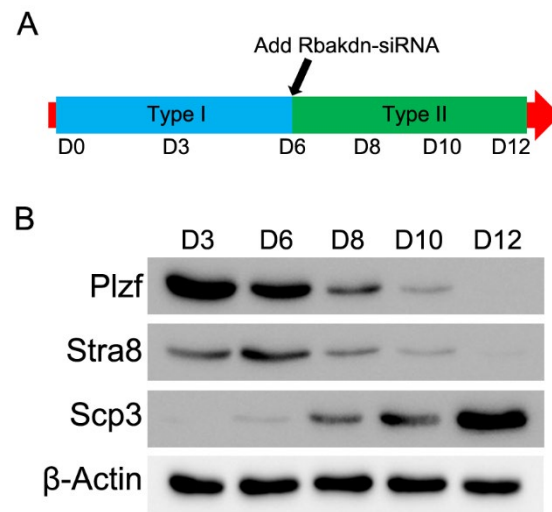

**Supplementary Figure 2. *In vitro* meiosis model for mouse spermatocytes.** (A) *In vitro* meiosis model for spermatocytes. Rbakdn-siRNA was added on the third day of induction. (B) The expression of meiotic markers during the induced process was confirmed by western blotting.  $\beta$ -Actin is served as a loading control.

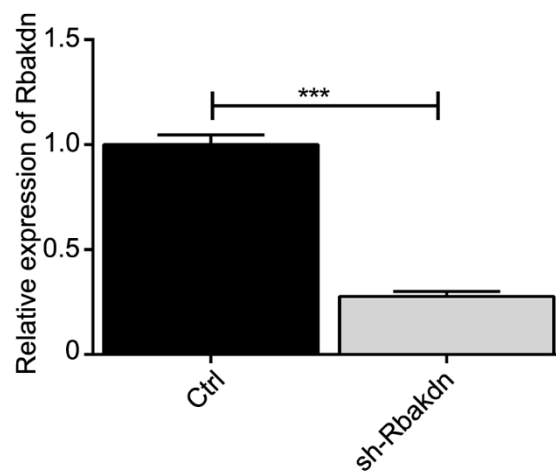

**Supplementary Figure 3. Knockdown efficiency of shRNA-Rbakdn in GC-2spd cells.** The expression of Rbakdn was assayed by RT-qPCR (\*\* $P < 0.001$ ).

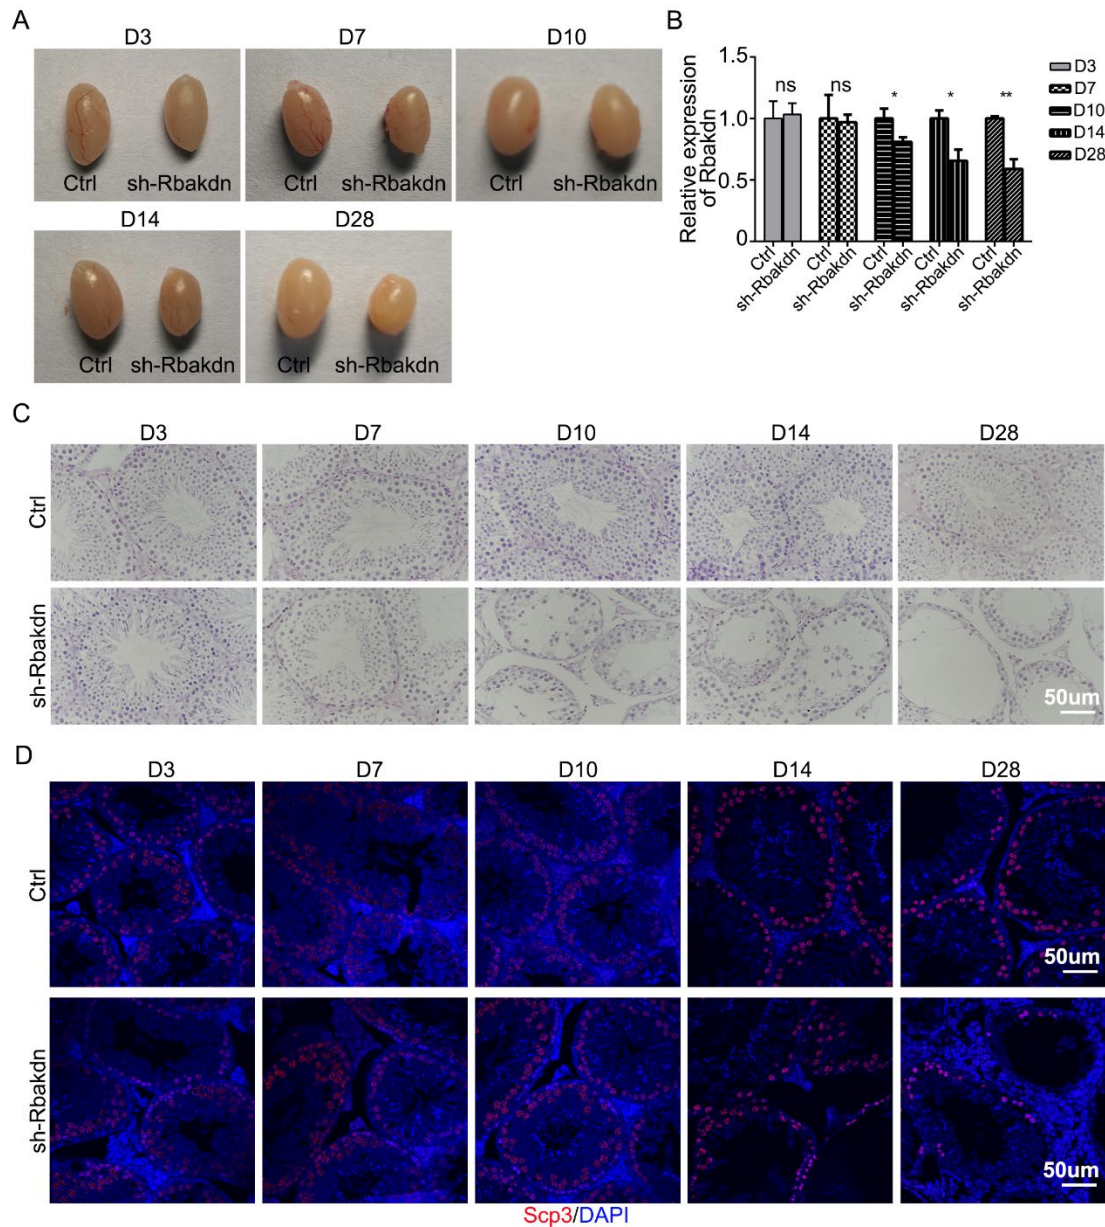

**Supplementary Figure 4. Knockdown of Rbakdn by lentiviral shRNAs.** (A) Morphology of testis at D3, D7, D10, D14, and D28 after injection of lentiviral Rbakdn-shRNA. (B) The knockdown efficiency of lentiviral shRNA-Rbakdn in testicular germ cells (\* $P < 0.05$ , \*\* $P < 0.01$ ). (C) Periodic acid-Schiff's staining of mouse testes after injection of lentiviral Rbakdn-shRNA at D3, D7, D10, D14, and D28. The red asterisks indicate the vacuoles. (D) Scp3 expression in testes injected with lentiviral Rbakdn-shRNA at D3, D7, D10, D14, and D28.
